# Supplementary material for: Phellem Cell-Wall Components Are Discriminants of Cork Quality in Quercus suber
Source: Front Plant Sci. 2019 Jul 30;10:944. doi: 10.3389/fpls.2019.00944 (PMC6682605; doi:10.3389/fpls.2019.00944)
Supplement: Supplementary file 3 [file Table_3.XLSX]

## Sheet: sup table S3
Supplementary Table S3 - Data on relative spot volume (mean ± standard error; n=5), univariate statistical analysis, protein identification by MS analysis and functional categorization for the proteins extracted from SQC and N-SQC producing cells. Experimental MW and pI was calculated taken the gel relative mobility of each spot, the theoretical MW and pI was calculated using the Compute pI/Mw to…
	Experimental molecular weight and isoeletric point		Theorethical molecular weight and isoeletric point		% vol ± stderror (in relation to the total volume in each fraction)			univariate stats
# spot	MW (kDa)	pI	MW (kDa)	pI	SQC	N-SQC	SQC to N-SQC log ratio	K-S	Mann-W	t-test	Identifier (protein/EST)	Protein name	Identification after peptide annotation
278	91 ± 1	5.87 ± 0.01	97.91	6.09	0.042 ± 0.023	0.037 ± 0.011	0.0536516	p > .10	0.754023	0.712585	XP_023923428.1; XP_023923428.1	Aconitate hydratase, cytoplasmic; Acotinase hydratase, cytoplasmatic
345	84 ± 1	6.93 ± 0.03			0.033 ± 0.017	0.038 ± 0.010	-0.0584761	p > .10	0.117186	0.634907
372	82 ± 1	4.69 ± 0.01			0.027 ± 0.008	0.022 ± 0.010	0.0910508	p > .10	0.347208	0.461748	XP_023926856.1	Protein disulfide isomerase-like 1-4
386	82 ± 1	5.56 ± 0.01	81.28	6.52	0.041 ± 0.007	0.043 ± 0.009	-0.0241097	p > .10	0.916815	0.695591	XP_023876033.1	Transketolase, chloroplastic
389	81 ± 1	5.64 ± 0.01	80.72	5.97	0.024 ± 0.005	0.028 ± 0.003	-0.0722484	p < .08	0.174526	0.156235	XP_023876033.1	Transketolase, chloroplastic
390	81 ± 1	5.50 ± 0.01	80.66	6.34	0.025 ± 0.004	0.028 ± 0.004	-0.0462153	p > .10	0.250593	0.388131	XP_023876033.1	Transketolase, chloroplastic
1826	12 ± 0	5.44 ± 0.01	17.52	5.95	0.213 ± 0.114	0.163 ± 0.098	0.114392	p > .10	0.464703	0.530884	XP_023908209.1	17.3 kDa class II heat shock protein-like
1639	17 ± 0	5.11 ± 0.01	10	5.03	0.163 ± 0.039	0.174 ± 0.029	-0.0286951	p > .10	0.601509	0.655947	CAB90686.1	Heat shock protein 17a.5
410	80 ± 1	5.11 ± 0.01	71.11	6.1	0.066 ± 0.008	0.072 ± 0.008	-0.0399731	p > .10	0.250593	0.295301
425	79 ± 1	5.12 ± 0.01			0.158 ± 0.016	0.196 ± 0.028	-0.0919116	p > .10	0.0472026	0.05
430	78 ± 1	5.18 ± 0.01			0.081 ± 0.014	0.117 ± 0.034	-0.158243	p > .10	0.347208	0.0858903
436	78 ± 1	5.48 ± 0.01	63.16	5.97	0.099 ± 0.031	0.105 ± 0.022	-0.0271996	p > .10	0.916815	0.743858
440	78 ± 1	5.63 ± 0.01			0.039 ± 0.009	0.042 ± 0.008	-0.027578	p > .10	0.464703	0.688568
441	78 ± 1	5.72 ± 0.01			0.057 ± 0.006	0.051 ± 0.009	0.0510888	p > .10	0.174526	0.245089
444	78 ± 1	5.65 ± 0.01			0.052 ± 0.005	0.045 ± 0.01	0.0668176	p > .10	0.250593	0.22714
449	78 ± 1	5.77 ± 0.01			0.055 ± 0.004	0.045 ± 0.009	0.0893117	p < .08	0.117186	0.08209
459	77 ± 1	5.88 ± 0.01			0.074 ± 0.011	0.072 ± 0.019	0.00954679	p > .10	0.916815	0.885466
466	76 ± 1	5.19 ± 0.01			0.163 ± 0.038	0.26 ± 0.095	-0.203439	p > .10	0.117186	0.092903
469	76 ± 1	5.22 ± 0.01			0.44 ± 0.046	0.521 ± 0.092	-0.0728328	p > .10	0.0758011	0.155693
472	76 ± 1	5.49 ± 0.01	83.6	6.22	0.044 ± 0.012	0.055 ± 0.011	-0.0998052	p > .10	0.117186	0.207827	XP_023911286.1	Beta-xylosidase/alpha-L-arabinofuranosidase 2-like
476	76 ± 1	6.76 ± 0.02	71.05	8.37	0.066 ± 0.046	0.045 ± 0.014	0.16422	p > .10	0.916815	0.413709	XP_023879781.1	Polyadenylate-binding protein 8-like
478	76 ± 1	7.71 ± 0.04	70.68	6.65	0.081 ± 0.023	0.083 ± 0.029	-0.0127813	p > .10	0.916815	0.8984	XP_023879781.1	Polyadenylate-binding protein 8-like
481	76 ± 1	7.06 ± 0.03	71.05	8.37	0.035 ± 0.014	0.046 ± 0.019	-0.121705	p > .10	0.464703	0.369132	XP_023879781.1	Polyadenylate-binding protein 8-like
482	76 ± 1	5.67 ± 0.01			0.046 ± 0.006	0.039 ± 0.01	0.0745224	p < .08	0.916815	0.25708
498	74 ± 1	5.38 ± 0.01	61.18	5.39	0.047 ± 0.004	0.053 ± 0.03	-0.0454712	p > .10	0.601509	0.739543
500	73 ± 1	5.23 ± 0.01			0.038 ± 0.01	0.04 ± 0.018	-0.0186165	p > .10	0.754023	0.876417
504	73 ± 1	5.26 ± 0.01	61.19	5.52	0.05 ± 0.014	0.054 ± 0.021	-0.0346469	p > .10	0.916815	0.750847	XP_023891669.1	2,3-bisphosphoglycerate-independent phosphoglycerate mutase
508	73 ± 1	5.3 ± 0.01	61.19	5.52	0.087 ± 0.02	0.075 ± 0.025	0.060239	p > .10	0.464703	0.506983	XP_023891669.1	2,3-bisphosphoglycerate-independent phosphoglycerate mutase
513	73 ± 1	5.34 ± 0.01	61.18	5.39	0.087 ± 0.031	0.054 ± 0.022	0.207802	p < .08	0.0472026	0.116693	XP_023891669.1	2,3-bisphosphoglycerate-independent phosphoglycerate mutase
526	71 ± 1	4.9 ± 0.01	53.03	4.91	1.367 ± 0.198	1.383 ± 0.433	-0.00519923	p > .10	0.916815	0.946556	XP_023874301.1	Protein disulfide-isomerase-like
533	71 ± 1	5.18 ± 0.01			0.097 ± 0.024	0.075 ± 0.015	0.109079	p > .10	0.250593	0.164518
537	71 ± 1	5.23 ± 0.01	61.18	5.39	0.060 ± 0.022	0.052 ± 0.022	0.0645784	p > .10	0.601509	0.61506
541	70 ± 1	5.09 ± 0.01			0.262 ± 0.104	0.238 ± 0.031	0.0419861	p > .10	0.916815	0.669129
543	70 ± 1	5.11 ± 0.01			0.114 ± 0.026	0.133 ± 0.014	-0.0640516	p > .10	0.174526	0.258254	XP_023922650.1	Uncharacterized protein LOC112034101
544	70 ± 1	4.97 ± 0.01	52.38	4.77	0.069 ± 0.013	0.073 ± 0.014	-0.0228984	p > .10	0.601509	0.708285	XP_023917736.1	Rubisco subunit binding-protein alpha subunit
550	70 ± 1	5.91 ± 0.01			0.035 ± 0.014	0.038 ± 0.012	-0.0403721	p < .08	0.754023	0.71749
554	70 ± 1	5.74 ± 0.01			0.03 ± 0.009	0.034 ± 0.007	-0.0521675	p > .10	0.347208	0.518941
581	67 ± 1	4.85 ± 0.01			0.066 ± 0.07	0.071 ± 0.082	-0.031527	p > .10	0.464703	0.928495	XP_023886486.1	Uncharacterized protein At5g39570-like isoform X2	PLD-regulated protein1-like (IPR038943)
582	67 ± 1	5.56 ± 0.01			0.034 ± 0.008	0.048 ± 0.004	-0.149117	p < .08	0.0282808	0.0161853	XP_023915795.1; ADL63286.1; XP_023920498.1	Mitochondrial processing peptidase beta subunit (probable); ATP synthase, F1 complex, alpha subunit; Pyruvate kinase 2, pastidial
583	67 ± 1	5.66 ± 0.01			0.099 ± 0.015	0.122 ± 0.015	-0.0914537	p < .08	0.0758011	0.0592036
584	67 ± 1	5.78 ± 0.01	58.88	6.56	0.151 ± 0.022	0.164 ± 0.038	-0.034998	p > .10	0.347208	0.582742	XP_023915795.1	Mitochondrial-processing peptidase subunit beta (probable)
593	66 ± 1	8.53 ± 0.04			0.048 ± 0.011	0.066 ± 0.017	-0.141011	p < .08	0.0758011	0.105821
600	66 ± 1	5.19 ± 0.01			0.043 ± 0.049	0.017 ± 0.005	0.401419	p > .10	0.601509	0.320146	XP_023883416.1; XP_023928354.1	ATP synthase subunit beta; Enolase 1
618	64 ± 1	4.61 ± 0.01	42.85	4.58	0.094 ± 0.02	0.082 ± 0.019	0.0598477	p > .10	0.347208	0.40209	XP_023926815.1	26S proteasome non-ATPase regulatory subunit 4 homolog
621	63 ± 1	5.76 ± 0.01	52.13	5.87	0.108 ± 0.022	0.099 ± 0.015	0.0379287	p > .10	0.754023	0.52705	XP_023870341.1; XP_023903360.1	UTP-glucose-1-phosphate uridylyltransferase; Aldehyde dehydrogenase family 2 member B7, mitochondrial-like
622	63 ± 1	6.57 ± 0.02			0.041 ± 0.004	0.045 ± 0.021	-0.0428093	p > .10	0.754023	0.708581
626	63 ± 1	5.71 ± 0.01	55.04	6.23	0.284 ± 0.056	0.304 ± 0.065	-0.0291128	p > .10	0.601509	0.656427	ABY66606.1; XP_023914970.1	ATP synthase subunit alpha; Enolase-like
633	63 ± 1	5.81 ± 0.01	47.95	5.71	0.329 ± 0.08	0.336 ± 0.050	-0.00862245	p > .10	0.916815	0.892298	XP_023914970.1	Enolase-like
639	63 ± 1	5.12 ± 0.01	49.14	5.25	0.141 ± 0.026	0.173 ± 0.032	-0.0870584	p > .10	0.174526	0.16709	XP_023883416.1; XP_023928354.1	ATP synthase subunit beta, mitochondrial-like; Enolase 1
640	63 ± 1	5.53 ± 0.01			0.189 ± 0.017	0.227 ± 0.05	-0.0789386	p < .08	0.117186	0.192889
641	63 ± 1	6.01 ± 0.01	47.95	5.71	0.561 ± 0.101	0.521 ± 0.089	0.0318155	p > .10	0.464703	0.572328	XP_023914970.1; XP_023870341.1	Enolase-like; UTP-glucose-1-phosphate uridylyltransferase
643	63 ± 1	6.24 ± 0.02	47.95	5.71	0.520 ± 0.091	0.493 ± 0.122	0.0231684	p > .10	0.601509	0.731986	XP_023914970.1	Enolase-like
644	63 ± 1	6.49 ± 0.02	57.04	6.95	0.078 ± 0.05	0.050 ± 0.02	0.191341	p > .10	0.117186	0.33578	XP_023920386.1	Catalase isozyme 3-like isoform X2
647	62 ± 1	5.16 ± 0.01	49.14	5.25	0.301 ± 0.080	0.314 ± 0.025	-0.0187564	p > .10	0.601509	0.759615	XP_023883416.1	ATP synthase subunit beta, mitochondrial-like
648	62 ± 1	5.3 ± 0.01			0.305 ± 0.025	0.320 ± 0.062	-0.0207516	p > .10	0.916815	0.669495	XP_023928354.1; XP_023883416.1	Enolase 1; ATP synthase subunit beta, mitochondrial-like
650	62 ± 1	5.62 ± 0.01	47.95	5.71	0.117 ± 0.018	0.135 ± 0.032	-0.060145	p > .10	0.464703	0.369826	XP_023928354.1; XP_023870341.1	Enolase 1; UTP-glucose-1-phosphate uridylyltransferase
657	62 ± 1	5.36 ± 0.01	48.16	5.49	0.488 ± 0.041	0.486 ± 0.073	0.00138941	p > .10	0.916815	0.971328	XP_023928354.1	Enolase 1
658	62 ± 1	5.57 ± 0.01	44.41	6.54	0.252 ± 0.056	0.243 ± 0.099	0.0173928	p > .10	0.754023	0.865634	ABY66606.1	ATP synthase subunit alpha
661	62 ± 1	6.85 ± 0.03	49.22	6.91	0.158 ± 0.042	0.158 ± 0.05	4.12829e-05	p > .10	0.916815	0.999643	XP_023920385.1	Catalase isozyme 3-like isoform X1
663	62 ± 1	5.44 ± 0.01	48.11	6.17	0.615 ± 0.03	0.718 ± 0.176	-0.0672679	p > .10	0.174526	0.281823	XP_023928354.1	Enolase 1
664	62 ± 1	7.15 ± 0.03	49.22	6.91	0.501 ± 0.149	0.549 ± 0.218	-0.0395173	p > .10	0.754023	0.727415	XP_023920386.1	Catalase isozyme 3-like isoform X2
668	62 ± 1	7.33 ± 0.03	57.04	6.95	0.348 ± 0.104	0.472 ± 0.259	-0.13235	p > .10	0.601509	0.400062	XP_023920386.1	Catalase isozyme 3-like isoform X2
669	62 ± 1	7.53 ± 0.03	57.04	6.95	0.341 ± 0.105	0.477 ± 0.331	-0.145654	p > .10	0.916815	0.456329	XP_023920386.1	Catalase isozyme 3-like isoform X2
670	61 ± 1	4.87 ± 0.01	26.93	8.83	0.144 ± 0.026	0.149 ± 0.03	-0.0142094	p > .10	0.754023	0.815728	XP_023928101.1	Protein SRC2
671	61 ± 1	7.79 ± 0.04	51.95	7.58	0.174 ± 0.052	0.193 ± 0.112	-0.0452221	p > .10	0.754023	0.764588	XP_023920385.1; XP_023900467.1	Catalase isozyme 3-like isoform X1; Serine hydroxymethyltransferase 4
672	61 ± 1	6 ± 0.01	52.29	5.24	0.059 ± 0.019	0.06 ± 0.016	-0.0113422	p > .10	0.916815	0.902687	XP_023870341.1; XP_023912791.1	UDP-glucose pyrophosphorylase; Dihydrolipoyl dehydrogenase 2, chloroplastic-like
674	61 ± 1	5.26 ± 0.01	50.56	6.19	0.037 ± 0.007	0.031 ± 0.013	0.0754994	p > .10	0.464703	0.43156	XP_023906105.1	Enolase 1, chloroplastic-like
675	61 ± 1	5.3 ± 0.01	50.56	6.19	0.022 ± 0.006	0.023 ± 0.007	-0.0253271	p > .10	0.754023	0.783556
682	60 ± 1	4.79 ± 0.01	40.72	4.6	0.103 ± 0.023	0.115 ± 0.018	-0.0486807	p > .10	0.464703	0.426977	XP_023914300.1	Ubiquitin receptor RAD23c-like
698	59 ± 1	5.41 ± 0.01	20.61	9.02	0.072 ± 0.029	0.115 ± 0.03	-0.203377	p > .10	0.0758011	0.0737227	XP_023893527.1	S-adenosylmethionine synthase 2
699	59 ± 1	5.44 ± 0.01	20.61	9.02	0.064 ± 0.029	0.099 ± 0.033	-0.186051	p > .10	0.174526	0.151719	XP_023913018.1	S-adenosylmethionine synthase 1-like
700	59 ± 1	5.47 ± 0.01	25.65	7.94	0.085 ± 0.041	0.105 ± 0.049	-0.0913435	p > .10	0.601509	0.551778	XP_023920689.1	S-adenosylmethionine synthase 3
701	59 ± 1	6.43 ± 0.02	51.71	6.8	0.079 ± 0.032	0.09 ± 0.024	-0.0571854	p > .10	0.347208	0.589471
708	59 ± 1	6.99 ± 0.03	54.57	8.23	0.162 ± 0.044	0.138 ± 0.039	0.068149	p > .10	0.754023	0.446741	XP_023920386.1	Catalase isozyme 3-like isoform X2
709	59 ± 1	5.23 ± 0.01	22.61	8.88	0.092 ± 0.027	0.117 ± 0.012	-0.103734	p > .10	0.250593	0.135004	XP_023920689.1	S-adenosylmethionine synthase 3
715	58 ± 1	5.05 ± 0.01	39.94	6.45	0.236 ± 0.052	0.248 ± 0.016	-0.0215944	p > .10	0.250593	0.672701
718	58 ± 1	5.27 ± 0.01	42.56	5.83	0.174 ± 0.032	0.181 ± 0.03	-0.015652	p > .10	0.754023	0.780221	XP_023920689.1	S-adenosylmethionine synthase 3
721	58 ± 1	4.7 ± 0.01	41.24	5.23	0.121 ± 0.041	0.108 ± 0.047	0.0500834	p > .10	0.754023	0.683306	XP_023882154.1	Protein SGT1 homolog isoform X2
724	58 ± 1	5.66 ± 0.01	42.55	5.82	0.040 ± 0.009	0.056 ± 0.011	-0.143876	p < .08	0.0282808	0.0560166	XP_023921498.1	Polyadenylate-binding protein RBP45C-like
730	57 ± 1	6.75 ± 0.02			0.027 ± 0.009	0.031 ± 0.009	-0.0575633	p > .10	0.754023	0.577472	XP_023900467.1; XP_023896568.1; XP_023882255.1	Serine hydroxymethyltransferase; RGG repeats nuclear RNA binding protein A-like; Suppressor of K+ transport growth defect 1 protein
733	57 ± 1	6.27 ± 0.02	58.37	6.49	0.037 ± 0.004	0.033 ± 0.013	0.0424291	p > .10	0.754023	0.619999	XP_023883834.1; XP_023887453.1	Biotin carboxylase 1, chloroplastic-like; Heterogeneous nuclear ribonucleoprotein 1-like
735	57 ± 1	5.86 ± 0.01	25.65	7.94	0.069 ± 0.016	0.070 ± 0.012	-0.0117639	p > .10	0.916815	0.857712	XP_023924800.1	RGG repeats nuclear RNA binding protein A-like
738	57 ± 1	6.2 ± 0.02	19.46	9.47	0.098 ± 0.011	0.098 ± 0.034	0.000415745	p > .10	0.916815	0.995904	XP_023920689.1; XP_023924800.1	S-adenosylmethionine synthase 3; RGG repeats nuclear RNA binding protein A-like
747	56 ± 1	7.13 ± 0.03	47.14	7.75	0.038 ± 0.008	0.048 ± 0.011	-0.0930152	p < .08	0.174526	0.215051	XP_023887453.1	Heterogeneous nuclear ribonucleoprotein 1-like
748	56 ± 1	4.78 ± 0.01	41.27	5.3	0.057 ± 0.011	0.076 ± 0.018	-0.123493	p < .08	0.0758011	0.11444	XP_023882154.1	Protein SGT1 homolog isoform X2
753	56 ± 1	6.32 ± 0.02	42.55	5.82	0.027 ± 0.005	0.022 ± 0.008	0.0915578	p > .10	0.250593	0.30443	XP_023920689.1	S-adenosylmethionine synthase 3
755	55 ± 1	5.77 ± 0.01	33.34	6.22	0.083 ± 0.016	0.067 ± 0.006	0.0932662	p > .10	0.174526	0.0948433	XP_023920689.1	S-adenosylmethionine synthase 3
758	55 ± 1	6.38 ± 0.02	66.53	9.07	0.063 ± 0.015	0.067 ± 0.013	-0.0260673	p > .10	0.916815	0.706744	XP_023920689.1	S-adenosylmethionine synthase 3
759	55 ± 1	5.93 ± 0.01	66.53	9.07	0.092 ± 0.008	0.077 ± 0.012	0.0801858	p > .10	0.117186	0.0665283	XP_023920689.1	S-adenosylmethionine synthase 3
762	55 ± 1	6.14 ± 0.02	43.14	5.77	0.097 ± 0.016	0.091 ± 0.011	0.0244852	p > .10	0.464703	0.590703	XP_023920689.1; XP_023916762.1	S-adenosylmethionine synthase 3; 3-oxoacyl-[acyl-carrier-protein] synthase I, chloroplastic
794	54 ± 1	5.31 ± 0.01	43.27	5.59	0.329 ± 0.11	0.265 ± 0.028	0.0937294	p > .10	0.174526	0.292764	XP_023893527.1	S-adenosylmethionine synthase 2
798	54 ± 1	5.64 ± 0.01	41.46	5.58	0.29 ± 0.287	0.119 ± 0.015	0.387288	p > .10	0.250593	0.268316	XP_023893527.1	S-adenosylmethionine synthase 2
799	54 ± 1	5.37 ± 0.01	43.27	5.59	0.492 ± 0.068	0.424 ± 0.035	0.063765	p < .10	0.0758011	0.116872	XP_023893527.1	S-adenosylmethionine synthase 2
802	54 ± 1	5.44 ± 0.01	43.1	5.51	0.764 ± 0.045	0.659 ± 0.112	0.0639879	p > .10	0.347208	0.121508	XP_023893527.1	S-adenosylmethionine synthase 2
804	53 ± 1	7.38 ± 0.03			0.048 ± 0.023	0.049 ± 0.016	-0.00797107	p > .10	0.754023	0.950946
806	53 ± 1	5.53 ± 0.01	43.21	5.68	1.04 ± 0.198	0.813 ± 0.191	0.107167	p > .10	0.117186	0.137514	XP_023893527.1	S-adenosylmethionine synthase 2
813	53 ± 1	7.63 ± 0.03	44.2	7.12	0.099 ± 0.042	0.101 ± 0.04	-0.00995055	p > .10	0.916815	0.939415	XP_023879763.1	UBP1-associated protein 2C
828	52 ± 1	8.8 ± 0.05	49.68	8.84	0.052 ± 0.009	0.104 ± 0.022	-0.297408	p < .025	0.00902386	0.00245336	XP_023876010.1	26S proteasome regulatory subunit 10B homolog A
833	52 ± 1	6.75 ± 0.02			0.056 ± 0.02	0.062 ± 0.034	-0.0465529	p > .10	0.916815	0.758002
834	52 ± 1	5.1 ± 0.01	37.88	5.29	0.044 ± 0.016	0.058 ± 0.007	-0.116081	p > .10	0.174526	0.145618	XP_023914012.1	Actin-7
835	52 ± 1	5.15 ± 0.01	41.74	5.31	0.09 ± 0.047	0.104 ± 0.012	-0.0637274	p > .10	0.250593	0.574212	XP_023914012.1	Actin-7
838	52 ± 1	6.39 ± 0.02			0.055 ± 0.016	0.056 ± 0.016	-0.0128327	p > .10	0.916815	0.88855
840	52 ± 1	5.2 ± 0.01	37.02	5.36	0.14 ± 0.07	0.161 ± 0.037	-0.0602391	p > .10	0.464703	0.613844	XP_023914012.1	Actin-7
852	51 ± 1	7.06 ± 0.03	42.35	5.57	0.039 ± 0.007	0.04 ± 0.011	-0.0146498	p > .10	0.754023	0.844902	XP_023895486.1	Heterogeneous nuclear ribonucleoprotein 1-like
862	50 ± 1	5.31 ± 0.01	66.53	9.07	0.1 ± 0.054	0.084 ± 0.031	0.0753426	p > .10	0.916815	0.621909
871	50 ± 1	5.15 ± 0.01			0.036 ± 0.019	0.055 ± 0.012	-0.180568	p > .10	0.117186	0.132486
880	49 ± 1	5.1 ± 0.01	45.4	5.8	0.021 ± 0.009	0.028 ± 0.006	-0.137484	p > .10	0.174526	0.188552	XP_023880642.1	Peroxidase 12
884	49 ± 1	5.66 ± 0.01			0.101 ± 0.015	0.104 ± 0.011	-0.0144206	p < .08	0.754023	0.721796
885	49 ± 1	6.44 ± 0.02	38.64	6.57	0.071 ± 0.018	0.079 ± 0.017	-0.0416011	p > .10	0.754023	0.583448	XP_023881864.1	Fructose-bisphosphate aldolase 6, cytosolic
899	48 ± 1	5.59 ± 0.01	44.51	5.86	0.02 ± 0.007	0.03 ± 0.013	-0.181781	p > .10	0.250593	0.212478	XP_023923462.1	Patatin-like protein 1 isoform X2
905	47 ± 1	6.71 ± 0.02			0.107 ± 0.007	0.123 ± 0.021	-0.06155	p > .10	0.174526	0.186121	XP_023881864.1; XP_023909286.1	Fructose-bisphosphate aldolase 6, cytosolic; Heterogeneous nuclear ribonucleoprotein A1, A2/B1 homolog
910	47 ± 1	5.3 ± 0.01	38.99	6.23	0.125 ± 0.03	0.101 ± 0.027	0.0918578	p > .10	0.250593	0.268113	XP_023870438.1	Mannitol dehydrogenase (probable)
912	47 ± 1	5.45 ± 0.01	40.28	5.65	0.141 ± 0.023	0.145 ± 0.036	-0.012011	p > .10	0.754023	0.857764
915	46 ± 1	5.38 ± 0.01			0.245 ± 0.031	0.241 ± 0.027	0.00694796	p > .10	0.754023	0.855754
916	46 ± 1	5.48 ± 0.01			0.111 ± 0.019	0.118 ± 0.017	-0.0257001	p > .10	0.754023	0.614969	XP_023924008.1	Naringenin,2-oxoglutarate 3-dioxygenase
917	46 ± 1	5.58 ± 0.01	38.99	6.23	0.142 ± 0.017	0.144 ± 0.02	-0.00544412	p > .10	0.754023	0.894219	XP_023894296.1	Mannitol dehydrogenase (probable)
920	46 ± 1	5.53 ± 0.01			0.186 ± 0.045	0.191 ± 0.04	-0.0107478	p > .10	0.754023	0.880959	XP_023870438.1; XP_023898841.1	Mannitol dehydrogenase (probable); Glutamine synthetase cytosolic isozyme 2
922	46 ± 1	5.70 ± 0.01	37.96	5.66	0.052 ± 0.011	0.047 ± 0.007	0.0439899	p < .08	0.347208	0.45238	XP_023894296.1	Mannitol dehydrogenase (probable)
937	46 ± 1	6.92 ± 0.03	38.63	6.57	0.465 ± 0.057	0.527 ± 0.106	-0.0545307	p > .10	0.250593	0.330378	XP_023881864.1	Fructose-bisphosphate aldolase 6, cytosolic
938	46 ± 1	7.34 ± 0.03			0.742 ± 0.17	0.783 ± 0.236	-0.0231144	p > .10	0.601509	0.78702	XP_023881864.1	Fructose-bisphosphate aldolase 6, cytosolic
941	46 ± 1	4.57 ± 0.02	37.31	4.45	0.125 ± 0.022	0.118 ± 0.036	0.0247387	p > .10	0.464703	0.751266	XP_023902957.1	Ankyrin repeat domain-containing protein 2A-like
942	46 ± 1	5.11 ± 0.01			0.106 ± 0.034	0.105 ± 0.017	0.00591718	p > .10	0.464703	0.941761
943	46 ± 1	7.83 ± 0.04	38.64	6.57	1.107 ± 0.311	1.086 ± 0.355	0.00864068	p > .10	0.916815	0.92862	XP_023881864.1	Fructose-bisphosphate aldolase 6, cytosolic
949	46 ± 1	5.16 ± 0.01	37.59	5.08	0.129 ± 0.044	0.101 ± 0.015	0.108415	p > .10	0.250593	0.250331
953	45 ± 1	5.21 ± 0.01	37.12	5.29	0.14 ± 0.051	0.11 ± 0.018	0.106273	p > .10	0.601509	0.294215	XP_023923522.1	Protein disulfide-isomerase A6 isoform X2 (probable)
954	45 ± 1	5.84 ± 0.01	39.98	6.23	0.122 ± 0.031	0.115 ± 0.024	0.0237681	p > .10	0.916815	0.750776	XP_023894296.1	Mannitol dehydrogenase (probable)
963	45 ± 1	6.00 ± 0.01	38.99	6.23	0.143 ± 0.044	0.162 ± 0.061	-0.0525927	p > .10	0.601509	0.639262	XP_023894296.1	Mannitol dehydrogenase (probable)
967	45 ± 1	5.26 ± 0.01	37.12	5.29	0.09 ± 0.016	0.083 ± 0.035	0.0309156	p > .10	0.347208	0.756355
969	45 ± 1	9.43 ± 0.05	36.94	8.24	0.412 ± 0.055	0.465 ± 0.094	-0.0517399	p > .10	0.754023	0.367882	XP_023872877.1	Glyceraldehyde-3-phosphate dehydrogenase, cytosolic isoform X1
971	44 ± 1	8.83 ± 0.05	36.94	8.24	0.451 ± 0.119	0.539 ± 0.113	-0.0774861	p > .10	0.174526	0.313345	XP_023872877.1	Glyceraldehyde-3-phosphate dehydrogenase, cytosolic isoform X1
980	44 ± 1	5.24 ± 0.01			0.062 ± 0.028	0.059 ± 0.024	0.0233594	p > .10	0.916815	0.861819
986	43 ± 1	5.4 ± 0.01	34.23	5.56	0.129 ± 0.033	0.126 ± 0.018	0.0115837	p > .10	0.916815	0.862467	XP_023922285.1	2-Methylene-furan-3-one reductase-like
987	43 ± 1	5.57 ± 0.01	34.17	5.92	0.226 ± 0.029	0.225 ± 0.059	0.00167346	p > .10	0.347208	0.979602	XP_023922285.1	2-Methylene-furan-3-one reductase-like
988	43 ± 1	6.84 ± 0.03			0.419 ± 0.049	0.525 ± 0.134	-0.097253	p > .10	0.250593	0.177284	XP_023882741.1; XP_023881864.1	Glyceraldehyde-3-phosphate dehydrogenase, cytosolic-like; Fructose-bisphosphate aldolase 6, cytosolic
990	43 ± 1	7.58 ± 0.03	23.77	7.84	0.285 ± 0.15	0.358 ± 0.165	-0.0989689	p > .10	0.464703	0.530623	XP_023872877.1	Glyceraldehyde-3-phosphate dehydrogenase, cytosolic isoform X1
995	43 ± 1	4.88 ± 0.01	26.93	8.83	0.353 ± 0.023	0.382 ± 0.086	-0.034636	p > .10	0.754023	0.529184	XP_023928101.1	Protein SRC2
998	42 ± 1	6.19 ± 0.02			0.365 ± 0.034	0.45 ± 0.095	-0.0906523	p > .10	0.117186	0.132017	XP_023879788.1	Malate dehydrogenase, mitochondrial
1002	42 ± 1	5.78 ± 0.01	34.68	5.87	0.267 ± 0.05	0.288 ± 0.144	-0.0337972	p > .10	0.601509	0.784341	XP_023895222.1	2-Methylene-furan-3-one reductase-like
1003	42 ± 1	6.51 ± 0.02	31.81	6.4	0.324 ± 0.061	0.362 ± 0.081	-0.0481558	p > .10	0.347208	0.476299
1007	42 ± 1	5.94 ± 0.01	27.33	5.57	0.246 ± 0.039	0.275 ± 0.036	-0.0470136	p > .10	0.174526	0.314639	XP_023879788.1	Malate dehydrogenase, mitochondrial
1010	42 ± 1	6.38 ± 0.02			0.214 ± 0.038	0.209 ± 0.052	0.00920286	p > .10	0.754023	0.892465	XP_023879788.1	Malate dehydrogenase, mitochondrial
1017	42 ± 1	5.44 ± 0.01			0.055 ± 0.009	0.067 ± 0.005	-0.0877203	p < .08	0.0472026	0.0432785	XP_023879788.1; XP_023894394.1	Malate dehydrogenase, mitochondrial; Aldo-keto reductase 2 (probable)
1022	41 ± 1	5.03 ± 0.01	41.65	9.23	0.077 ± 0.024	0.070 ± 0.034	0.0432441	p < .08	0.601509	0.73624	XP_023914015.1	Enoyl-[acyl-carrier-protein] reductase [NADH] 1, chloroplastic-like
1023	41 ± 1	5.11 ± 0.01	41.58	8.92	0.170 ± 0.040	0.151 ± 0.053	0.0508211	p > .10	0.601509	0.58861	XP_023914015.1	Enoyl-[acyl-carrier-protein] reductase [NADH] 1, chloroplastic-like
1025	41 ± 1	5.18 ± 0.01	41.88	8.2	0.330 ± 0.061	0.271 ± 0.054	0.0849525	p > .10	0.174526	0.186599	XP_023914015.1	Enoyl-[acyl-carrier-protein] reductase [NADH] 1, chloroplastic-like
1032	40 ± 1	4.87 ± 0.01	26.93	8.83	0.225 ± 0.063	0.172 ± 0.033	0.117134	p > .10	0.347208	0.172471	XP_023928101.1; XP_023922013.1	Protein SRC2; Fructokinase-2
1038	40 ± 1	5.49 ± 0.01	36.2	6.81	0.222 ± 0.014	0.250 ± 0.035	-0.0521526	p > .10	0.347208	0.171089	XP_023899491.1	Annexin D1
1041	40 ± 1	4.98 ± 0.01	35.45	5.07	0.158 ± 0.031	0.117 ± 0.034	0.130024	p > .10	0.174526	0.115416	XP_023922013.1; XP_023899194.1	Fructokinase-2; Proteasome subunit alpha type-1-B-like isoform X2
1044	40 ± 1	5.6 ± 0.01	36.2	6.81	0.479 ± 0.067	0.666 ± 0.134	-0.143277	p < .08	0.0282808	0.0368972	XP_023899491.1	Annexin D1
1045	40 ± 1	4.52 ± 0.02	30.09	4.62	0.033 ± 0.007	0.038 ± 0.004	-0.0633987	p > .10	0.250593	0.255486	XP_023928101.1	Protein SRC2
1058	39 ± 1	5.84 ± 0.01	33.93	5.6	0.268 ± 0.064	0.382 ± 0.094	-0.154132	p < .08	0.0472026	0.0799311	XP_023910627.1	Isoflavone reductase-like protein
1061	39 ± 1	4.37 ± 0.02	27.04	4.65	0.03 ± 0.004	0.026 ± 0.006	0.0652471	p > .10	0.347208	0.292799	FN735699.1	FN735699 WZOAQPAC Quercus petraea cDNA clone WZ0AQPAC2YJ16FM1, mRNA sequence	Glycine-rich RNA-binding protein
1066	39 ± 1	5.71 ± 0.01	33.94	5.75	0.115 ± 0.016	0.17 ± 0.063	-0.170621	p < .08	0.0472026	0.12775	XP_023910627.1	Isoflavone reductase-like protein
1067	39 ± 1	6.09 ± 0.02	34	5.51	0.649 ± 0.178	0.95 ± 0.29	-0.165048	p < .08	0.0758011	0.115891	XP_023910627.1	Isoflavone reductase-like protein
1068	39 ± 1	7.06 ± 0.03	35.09	9.04	0.679 ± 0.343	0.366 ± 0.242	0.268667	p > .10	0.117186	0.173366	XP_023910627.1	Isoflavone reductase-like protein
1070	39 ± 1	6.38 ± 0.02	33.15	7.82	1.095 ± 0.243	1.278 ± 0.278	-0.0669526	p > .10	0.347208	0.351202	XP_023910627.1	Isoflavone reductase-like protein
1076	38 ± 1	6.7 ± 0.02	33.9	5.92	1.395 ± 0.281	1.55 ± 0.429	-0.0459314	p > .10	0.916815	0.560921	XP_023910627.1	Isoflavone reductase-like protein
1081	38 ± 1	5.17 ± 0.01	41.41	8.72	0.138 ± 0.063	0.132 ± 0.029	0.0178534	p > .10	0.754023	0.876606	XP_023903440.1	Enoyl-[acyl-carrier-protein] reductase [NADH], chloroplastic
1083	38 ± 1	5.1 ± 0.01	41.41	8.72	0.043 ± 0.016	0.046 ± 0.007	-0.0326559	p > .10	0.601509	0.706296	XP_023903440.1	Enoyl-[acyl-carrier-protein] reductase [NADH], chloroplastic
1088	37 ± 1	5.42 ± 0.01	34.34	5.5	0.24 ± 0.026	0.276 ± 0.026	-0.0611254	p > .10	0.0758011	0.0833597	XP_023876555.1	Cysteine synthase
1093	37 ± 1	6.34 ± 0.02	33.94	5.75	0.088 ± 0.034	0.084 ± 0.017	0.017944	p > .10	0.754023	0.85673	XP_023910627.1	Isoflavone reductase-like protein
1099	37 ± 1	4.42 ± 0.02	27.04	4.65	0.268 ± 0.024	0.271 ± 0.091	-0.00483623	p > .10	0.601509	0.950514	XP_023894212.1; FN735699.1	28 kDa Ribonucleoprotein, chloroplastic-like; Glycine-rich RNA-binding protein 3, mitochondrial
1101	37 ± 1	5.67 ± 0.01	33.15	7.82	0.032 ± 0.011	0.055 ± 0.013	-0.238891	p < .08	0.0472026	0.0254373	XP_023910627.1	Isoflavone reductase-like protein
1102	37 ± 1	8 ± 0.04	29.36	7.79	0.098 ± 0.038	0.089 ± 0.008	0.0387775	p > .10	0.754023	0.680516	XP_023911743.1	Mitochondrial outer membrane protein porin of 34 kDa
1105	37 ± 1	5.25 ± 0.01	34.34	5.5	0.056 ± 0.014	0.071 ± 0.008	-0.105127	p < .08	0.117186	0.0946577	XP_023876555.1	Cysteine synthase
1106	37 ± 1	5.84 ± 0.01			0.055 ± 0.014	0.079 ± 0.052	-0.15619	p > .10	0.916815	0.404889	XP_023910627.1; FN743190.1	Isoflavone reductase-like protein; FN743190 WZOAQPAG Quercus petraea cDNA clone WZ0AQPAG5YO12CM1, mRNA sequence	Annexin
1115	36 ± 1	9.27 ± 0.05	29.36	7.79	0.241 ± 0.043	0.281 ± 0.046	-0.0654666	p > .10	0.601509	0.251296	XP_023911743.1	Mitochondrial outer membrane protein porin of 34 kDa
1116	36 ± 1	9.84 ± 0.06	29.36	7.79	0.468 ± 0.122	0.493 ± 0.051	-0.02305	p > .10	0.916815	0.709345	XP_023911743.1	Mitochondrial outer membrane protein porin of 34 kDa
1126	35 ± 0	5.49 ± 0.01	35.18	7.13	0.023 ± 0.004	0.02 ± 0.004	0.0517037	p > .10	0.464703	0.414121	XP_023890209.1	Annexin D2-like
1130	35 ± 0	5.19 ± 0.01	26.47	6.22	0.041 ± 0.024	0.031 ± 0.005	0.120923	p > .10	0.916815	0.435668
1136	35 ± 0	5.25 ± 0.01			0.043 ± 0.013	0.057 ± 0.027	-0.121876	p > .10	0.464703	0.383088
1137	35 ± 0	5.00± 0.01	24.15	5.56	0.03 ± 0.012	0.026 ± 0.004	0.0588411	p > .10	0.601509	0.54852	XP_023921534.1	Inorganic pyrophosphatase 1-like, soluble
1143	34 ± 0	10.36 ± 0.06	30.89	9.11	0.09 ± 0.034	0.161 ± 0.075	-0.249942	p > .10	0.117186	0.128323	XP_023924203.1	Glucan endo-1,3-beta-glucosidase, basic isoform-like
1145	34 ± 0	5.1 ± 0.01	28.59	5.84	0.077 ± 0.093	0.045 ± 0.004	0.236947	p > .10	0.464703	0.506233	XP_023921534.1	Inorganic pyrophosphatase 1-like, soluble
1153	33 ± 0	6.25 ± 0.02	31.11	7.7	0.030 ± 0.003	0.027 ± 0.011	0.0507925	p < .08	0.117186	0.588768
1157	33 ± 0	4.77 ± 0.01	77.84	6.29	0.154 ± 0.03	0.139 ± 0.042	0.0439397	p > .10	0.601509	0.578899	XP_023913861.1	Ran-binding protein 1 homolog a-like
1158	33 ± 0	4.53 ± 0.02	23.71	4.37	0.094 ± 0.023	0.089 ± 0.034	0.0227779	p > .10	0.601509	0.823203	XP_023896817.1	Nascent polypeptide-associated complex subunit alpha-like protein 2
1163	33 ± 0	6.12 ± 0.02	31.12	5.91	0.066 ± 0.013	0.092 ± 0.007	-0.144796	p < .08	0.0162942	0.00648171	XP_023879941.1	Calcium-binding protein CML50 (probable)
1167	33 ± 0	5.56 ± 0.01			0.049 ± 0.009	0.049 ± 0.005	0.00275193	p > .10	0.754023	0.954168
1168	33 ± 0	5.75 ± 0.01			0.037 ± 0.008	0.038 ± 0.002	-0.00681362	p > .10	0.754023	0.884757
1174	32 ± 0	8.35 ± 0.04			0.06 ± 0.022	0.076 ± 0.016	-0.105206	p < .08	0.250593	0.268255	XP_023913255.1	Protein FLX-like 3
1175	32 ± 0	5.08 ± 0.01	33.91	5.91	0.134 ± 0.043	0.119 ± 0.019	0.0514602	p < .08	0.464703	0.544897	XP_023913506.1	Inorganic pyrophosphatase 6, soluble, chloroplastic
1177	32 ± 0	5.14 ± 0.01	33.91	5.91	0.051 ± 0.012	0.074 ± 0.025	-0.166493	p < .08	0.117186	0.127153	XP_023913506.1	Inorganic pyrophosphatase 6, soluble, chloroplastic
1180	32 ± 0	5.02 ± 0.01	28.69	7.55	0.071 ± 0.016	0.068 ± 0.011	0.0193638	p > .10	0.601509	0.763934	XP_023913506.1	Inorganic pyrophosphatase 6, soluble, chloroplastic
1184	32 ± 0	4.97 ± 0.01	27.85	5.57	0.052 ± 0.017	0.047 ± 0.013	0.0412775	p > .10	0.347208	0.665128
1185	32 ± 0	5.43 ± 0.01	37.38	6.43	0.059 ± 0.005	0.057 ± 0.008	0.0133657	p > .10	0.601509	0.713176	XP_023923537.1	Pirin-like protein isoform X2
1187	32 ± 0	6.33 ± 0.02	29.34	7.78	0.066 ± 0.015	0.068 ± 0.018	-0.0147515	p > .10	0.754023	0.849886	XP_023928050.1	Mitochondrial outer membrane protein porin of 36 kDa
1194	32 ± 0	5.89 ± 0.01	28.53	5.78	0.074 ± 0.01	0.06 ± 0.018	0.0910442	p < .08	0.174526	0.212698	XP_023924528.1	Uncharacterized protein LOC112035936	LOW QUALITY PROTEIN: kynurenine formamidase-like
1195	32 ± 0	7.16 ± 0.03			0.269 ± 0.077	0.347 ± 0.044	-0.109923	p > .10	0.174526	0.118227	XP_023924128.1; XP_023928050.1	Adenylate kinase 4; Mitochondrial outer membrane protein porin of 36 kDa
1198	31 ± 0	7.58 ± 0.03	29.26	7.91	0.441 ± 0.092	0.496 ± 0.15	-0.0508368	p > .10	0.464703	0.550388	XP_023928050.1	Mitochondrial outer membrane protein porin of 36 kDa
1201	31 ± 0	6.74 ± 0.02	29.26	7.91	0.228 ± 0.034	0.298 ± 0.079	-0.116879	p > .10	0.117186	0.140455	XP_023928050.1	Mitochondrial outer membrane protein porin of 36 kDa
1206	31 ± 0	5.7 ± 0.01			0.065 ± 0.004	0.07 ± 0.013	-0.0346799	p > .10	0.250593	0.43768	XP_023882750.1	3-Oxoacyl-[acyl-carrier-protein] reductase 4-like isoform X1
1220	31 ± 0	9.13 ± 0.05	29.29	8.64	0.295 ± 0.061	0.413 ± 0.046	-0.145436	p < .08	0.0162942	0.0155404	XP_023888251.1	Mitochondrial outer membrane protein porin 2-like
1226	30 ± 0	7.96 ± 0.04	29.29	8.64	0.271 ± 0.085	0.287 ± 0.047	-0.0257522	p > .10	0.601509	0.742818	XP_023888251.1	Mitochondrial outer membrane protein porin 2-like
1235	30 ± 0	5.25 ± 0.01	27.44	5.41	0.176 ± 0.016	0.231 ± 0.059	-0.118417	p > .10	0.174526	0.109986	XP_023893302.1	Glutathione S-transferase L3-like
1242	29 ± 0	4.98 ± 0.01	27.79	5.29	0.342 ± 0.072	0.283 ± 0.1	0.0821975	p > .10	0.347208	0.367933	XP_023879901.1	Caffeoyl-CoA O-methyltransferase
1243	29 ± 0	5.04 ± 0.01	27.78	5.4	0.483 ± 0.097	0.393 ± 0.115	0.0900183	p > .10	0.464703	0.262474	XP_023879901.1	Caffeoyl-CoA O-methyltransferase
1244	29 ± 0	5.82 ± 0.01	26.67	7.65	0.027 ± 0.007	0.036 ± 0.01	-0.120006	p > .10	0.117186	0.182252	XP_023910606.1	Adenylate kinase 4-like
1245	29 ± 0	6.25 ± 0.02	29.47	5.72	0.061 ± 0.008	0.064 ± 0.013	-0.0198815	p > .10	0.754023	0.72449
1246	29 ± 0	7.5 ± 0.03	29.29	8.64	0.053 ± 0.019	0.067 ± 0.039	-0.102853	p > .10	0.916815	0.529275	XP_023888251.1	Mitochondrial outer membrane protein porin 2-like
1247	29 ± 0	5.52 ± 0.01	29.5	5.78	0.157 ± 0.016	0.165 ± 0.028	-0.0204361	p > .10	0.464703	0.650121	XP_023899196.1; XP_023893302.1	Gamma carbonic anhydrase 1, mitochondrial; Glutathione S-transferase L3-like
1262	29 ± 0	6.85 ± 0.03	35.49	8.87	0.062 ± 0.016	0.071 ± 0.01	-0.0580959	p < .08	0.250593	0.378537	XP_023927550.1	NADH-cytochrome b5 reductase-like protein
1263	29 ± 0	9.13 ± 0.05	29.45	8.81	0.099 ± 0.025	0.078 ± 0.014	0.10269	p < .08	0.174526	0.180906	XP_023896843.1	Uncharacterized protein LOC112008744	Biotin carboxyl carrier protein of acetyl-CoA carboxylase-like
1269	28 ± 0	5.16 ± 0.01	27.67	5.88	0.03 ± 0.014	0.036 ± 0.01	-0.0688678	p > .10	0.347208	0.560523	XP_023879901.1	Caffeoyl-CoA O-methyltransferase
1277	28 ± 0	5.06 ± 0.01			0.035 ± 0.01	0.028 ± 0.006	0.0978471	p > .10	0.347208	0.279654	XP_023879901.1; XP_023913878.1	Caffeoyl-CoA O-methyltransferase; Uncharacterized protein At5g02240-like
1278	28 ± 0	5.19 ± 0.01	29.51	4.97	0.047 ± 0.014	0.048 ± 0.011	-0.00389183	p > .10	0.916815	0.962732	XP_023913878.1	Uncharacterized protein At5g02240-like	NAD(P)-binding domain superfamily (IPR036291)
1279	28 ± 0	4.94 ± 0.01	20.03	5.15	0.128 ± 0.024	0.112 ± 0.041	0.0577414	p > .10	0.464703	0.51989	XP_023885384.1	Endo-1,3; 1,4-beta-D-glucanase-like
1282	28 ± 0	6.32 ± 0.02			0.037 ± 0.008	0.039 ± 0.018	-0.0153886	p > .10	0.754023	0.89535
1292	27 ± 0	5.25 ± 0.01			0.208 ± 0.042	0.272 ± 0.045	-0.116306	p > .10	0.0758011	0.0742227
1294	27 ± 0	7.02 ± 0.03	27.68	9.26	0.057 ± 0.007	0.069 ± 0.01	-0.0832475	p < .08	0.0472026	0.0894567	XP_023904931.1	ATP synthase 24 kDa subunit, mitochondrial (probable)
1295	27 ± 0	9.19 ± 0.05	27.68	9.26	0.354 ± 0.06	0.386 ± 0.076	-0.0370649	p > .10	0.754023	0.53237	XP_023904931.1	ATP synthase 24 kDa subunit, mitochondrial (probable)
1296	27 ± 0	5.17 ± 0.01	23.08	5.61	0.296 ± 0.111	0.322 ± 0.044	-0.0370035	p > .10	0.601509	0.670928	XP_023918993.1; XP_023894071.1	UMP-CMP kinase 3-like isoform X1; Proteasome subunit alpha type-2-B
1297	27 ± 0	6.37 ± 0.02	27.71	5.88	0.079 ± 0.026	0.083 ± 0.033	-0.0186664	p > .10	0.601509	0.873328	XP_023904762.1	Triosephosphate isomerase, cytosolic-like
1303	26 ± 0	4.42 ± 0.02	22.03	4.34	0.442 ± 0.058	0.388 ± 0.126	0.0570348	p > .10	0.464703	0.456678	XP_023919404.1; XP_023929527.1	Nascent polypeptide-associated complex subunit alpha-like protein 1; MFP1 attachment factor 1-like
1307	26 ± 0	8.18 ± 0.04	27.68	9.26	0.214 ± 0.037	0.283 ± 0.036	-0.121506	p < .08	0.0282808	0.0291855	XP_023904931.1	ATP synthase 24 kDa subunit, mitochondrial (probable)
1310	26 ± 0	5.31 ± 0.01	25.62	5.48	0.223 ± 0.035	0.234 ± 0.031	-0.0217984	p > .10	0.347208	0.636386	XP_023894071.1	Proteasome subunit alpha type-2-B
1312	26 ± 0	5.6 ± 0.01	20.97	5.73	0.218 ± 0.027	0.213 ± 0.035	0.0102643	p > .10	0.916815	0.824408	XP_023909159.1	L-Ascorbate peroxidase, cytosolic-like
1313	26 ± 0	5.66 ± 0.01	20.97	5.73	0.312 ± 0.021	0.385 ± 0.112	-0.0903778	p < .08	0.117186	0.239276	XP_023909159.1	L-Ascorbate peroxidase, cytosolic-like
1314	26 ± 0	5.91 ± 0.01	27.71	5.88	0.131 ± 0.016	0.132 ± 0.04	-0.000489413	p > .10	0.916815	0.99471	XP_023904762.1	Triosephosphate isomerase, cytosolic-like
1316	26 ± 0	5.83 ± 0.01	20.97	5.73	0.243 ± 0.037	0.298 ± 0.144	-0.0883075	p > .10	0.916815	0.483009	XP_023909159.1; XP_023904762.1	L-Ascorbate peroxidase, cytosolic-like; Triosephosphate isomerase, cytosolic-like
1319	26 ± 0	5.48 ± 0.01			0.949 ± 0.108	1.047 ± 0.172	-0.0428562	p < .08	0.464703	0.360856	XP_023894071.1; XP_023909159.1	Proteasome subunit alpha type-2-B; L-Ascorbate peroxidase, cytosolic-like
1320	26 ± 0	6.24 ± 0.02			0.047 ± 0.014	0.053 ± 0.013	-0.0538705	p > .10	0.464703	0.537128
1321	26 ± 0	6.53 ± 0.02	25.06	6.38	0.04 ± 0.014	0.041 ± 0.01	-0.0156178	p > .10	0.601509	0.867455	XP_023921278.1	GTP-binding nuclear protein Ran-3-like
1336	25 ± 0	5.59 ± 0.01	23.44	6.09	0.031 ± 0.01	0.049 ± 0.034	-0.192959	p > .10	0.754023	0.346762	XP_023924305.1	Glutathione S-transferase DHAR2-like
1348	25 ± 0	5.74 ± 0.01	23.44	6.09	0.146 ± 0.009	0.131 ± 0.02	0.0476456	p < .08	0.174526	0.213113	XP_023924305.1	Glutathione S-transferase DHAR2-like
1349	25 ± 0	5.84 ± 0.01	23.44	6.09	0.100 ± 0.015	0.089 ± 0.009	0.0515983	p > .10	0.601509	0.23802	XP_023924305.1	Glutathione S-transferase DHAR2-like
1353	25 ± 0	5.53 ± 0.01	24.46	5.5	0.028 ± 0.007	0.041 ± 0.025	-0.159232	p > .10	0.250593	0.360266	XP_023912238.1	Uncharacterized protein LOC112023844 isoform X3	Thioredoxin-like superfamily
1354	25 ± 0	6.36 ± 0.02	23.45	6.32	0.407 ± 0.047	0.342 ± 0.053	0.0754698	p < .08	0.0472026	0.102565	XP_023924305.1	Glutathione S-transferase DHAR2-like
1356	25 ± 0	6.09 ± 0.02	23.45	6.32	0.297 ± 0.034	0.292 ± 0.046	0.00755889	p < .08	0.601509	0.861799	XP_023924305.1	Glutathione S-transferase DHAR2-like
1362	25 ± 0	7.15 ± 0.03			0.042 ± 0.012	0.053 ± 0.01	-0.10516	p < .08	0.174526	0.173622
1363	25 ± 0	5.23 ± 0.01	23.82	5.29	0.122 ± 0.046	0.126 ± 0.057	-0.0134065	p > .10	0.916815	0.918449
1366	25 ± 0	5.15 ± 0.01	23.82	5.29	0.085 ± 0.035	0.069 ± 0.016	0.0888718	p > .10	0.464703	0.441749
1370	24 ± 0	4.7 ± 0.01	25.9	4.71	0.163 ± 0.017	0.129 ± 0.045	0.100883	p > .10	0.250593	0.198168	XP_023912206.1	Proteasome subunit alpha type-5
1376	24 ± 0	7.56 ± 0.03			0.055 ± 0.02	0.069 ± 0.022	-0.10191	p > .10	0.250593	0.364806
1744	15 ± 0	5.38 ± 0.01	10	5.03	0.594 ± 0.131	0.487 ± 0.062	0.0861127	p > .10	0.347208	0.178771	XP_023890893.1	18.1 kDa class I heat shock protein-like
1399	23 ± 0	5.49 ± 0.01			0.11 ± 0.026	0.13 ± 0.024	-0.0726845	p > .10	0.464703	0.296203	XP_023913097.1	20 kDa Chaperonin, chloroplastic-like
1404	23 ± 0	6.4 ± 0.02			0.07 ± 0.014	0.078 ± 0.023	-0.0461463	p > .10	0.464703	0.57292	XP_023873059.1	UPF0664 Stress-induced protein C29B12.11c
1405	23 ± 0	5.71 ± 0.01	25.4	6.29	0.028 ± 0.004	0.028 ± 0.007	0.00493191	p > .10	0.754023	0.941101	XP_023916258.1	Proteasome subunit beta type-1
1412	23 ± 0	6.93 ± 0.03	29.26	6.12	0.186 ± 0.066	0.263 ± 0.094	-0.149887	p > .10	0.250593	0.219026	XP_023920220.1	Proteasome subunit beta type-5-like
1415	23 ± 0	6.27 ± 0.02			0.066 ± 0.018	0.069 ± 0.014	-0.0232307	p > .10	0.754023	0.762086
1416	23 ± 0	6.64 ± 0.02			0.117 ± 0.033	0.174 ± 0.043	-0.173832	p < .08	0.0472026	0.0679285	XP_023922101.1	Glutathione S-transferase-like
1422	23 ± 0	5.24 ± 0.01			0.098 ± 0.034	0.139 ± 0.048	-0.152394	p > .10	0.250593	0.195067
1426	23 ± 0	5.66 ± 0.01	21.67	5.96	0.066 ± 0.013	0.047 ± 0.019	0.14938	p < .08	0.117186	0.137992	XP_023913097.1	NAD(P)H dehydrogenase (quinone) FQR1
1431	22 ± 0	5.57 ± 0.01	21.73	5.83	0.025 ± 0.008	0.022 ± 0.009	0.0516909	p > .10	0.601509	0.645986	XP_023913097.1	NAD(P)H dehydrogenase (quinone) FQR1
1436	22 ± 0	5.75 ± 0.01	21.73	5.83	0.378 ± 0.059	0.366 ± 0.076	0.0142618	p > .10	0.916815	0.805971	XP_023913097.1	NAD(P)H dehydrogenase (quinone) FQR1
1441	22 ± 0	5.47 ± 0.01	21.73	5.83	0.207 ± 0.021	0.219 ± 0.028	-0.0244701	p > .10	0.464703	0.509812	XP_023913097.1	NAD(P)H dehydrogenase (quinone) FQR1
1453	22 ± 0	8.53 ± 0.04	25.28	6.3	0.063 ± 0.017	0.126 ± 0.03	-0.303507	p < .025	0.00902386	0.00597381	XP_023921666.1	Uncharacterized protein LOC112033118	Basic secretory protein (BSP)
1464	21 ± 0	6.02 ± 0.01	24.49	7.93	0.087 ± 0.015	0.119 ± 0.03	-0.139125	p > .10	0.117186	0.0828853	XP_023872509.1	Superoxide dismutase [Mn], mitochondrial-like
1486	20 ± 0	4.62 ± 0.01	4.62	19.1	0.073 ± 0.015	0.079 ± 0.032	-0.0342713	p < .08	0.916815	0.740382	AWM95753.1	Translationally-controlled tumor protein
1496	20 ± 0	4.99 ± 0.01			0.079 ± 0.016	0.075 ± 0.011	0.025996	p < .08	0.754023	0.653206	XP_023884452.1	Uncharacterized protein LOC111996686	RmlC-like cupin domain superfamily
1501	20 ± 0	10.45 ± 0.06			0.041 ± 0.003	0.068 ± 0.044	-0.226125	p > .10	0.601509	0.248899
1549	19 ± 0	5.88 ± 0.01	22.47	6.07	0.04 ± 0.009	0.051 ± 0.026	-0.10233	p < .08	0.916815	0.462078
1598	18 ± 0	5.01 ± 0.01	22.24	4.77	0.029 ± 0.01	0.044 ± 0.027	-0.182898	p < .08	0.347208	0.320754	XP_023892637.1; XP_023896784.1	Alpha-amylase/subtilisin inhibitor-like; Small heat shock protein, chloroplastic-like
1634	18 ± 0	4.41 ± 0.02	19.14	4.52	0.031 ± 0.006	0.064 ± 0.053	-0.31334	p > .10	0.601509	0.255248	XP_023892637.1	Alpha-amylase/subtilisin inhibitor-like
1762	14 ± 0	6.19 ± 0.02	17.39	6.34	1.874 ± 0.469	1.795 ± 0.386	0.0188302	p > .10	0.464703	0.799915	XP_023890893.1	18.1 kDa class I heat shock protein-like
1647	17 ± 0	4.54 ± 0.02	19.13	4.54	0.086 ± 0.022	0.101 ± 0.063	-0.0669949	p > .10	0.754023	0.676356	XP_023876037.1	Translationally-controlled tumor protein homolog
1669	17 ± 0	4.91 ± 0.01	19.74	5.33	0.387 ± 0.082	0.374 ± 0.043	0.0153231	p > .10	0.754023	0.77878	XP_023887336.1	ATP synthase subunit d, mitochondrial
1687	16 ± 0	6.27 ± 0.02	24.6	8.95	0.043 ± 0.004	0.03 ± 0.006	0.157719	p < .08	0.0162942	0.00710665	XP_023893083.1	Uncharacterized protein LOC112005067	3-hydroxyacyl-(acyl-carrier-protein) dehydratase
1694	16 ± 0	6.82 ± 0.03	19.85	6.81	0.108 ± 0.016	0.138 ± 0.034	-0.105806	p > .10	0.174526	0.152855	XP_023883669.1	Glycine-rich protein 2-like
1697	16 ± 0	7.11 ± 0.03	19.18	5.93	0.051 ± 0.007	0.063 ± 0.02	-0.092998	p > .10	0.250593	0.292504	XP_023883669.1	Glycine-rich protein 2-like
1703	16 ± 0	6.40 ± 0.02	17.17	7.94	0.311 ± 0.04	0.302 ± 0.034	0.0134446	p < .08	0.754023	0.726959	XP_023894704.1; XP_023883669.1	Nascent polypeptide-associated complex subunit beta-like; Glycine-rich protein 2-like
1708	16 ± 0	5.52 ± 0.01	21.48	8.43	0.054 ± 0.005	0.059 ± 0.004	-0.0380776	p < .08	0.250593	0.144612	XP_023895699.1; XP_023883669.1	Peroxiredoxin-2F, mitochondrial isoform X2; Glycine-rich protein 2-like
1709	16 ± 0	5.94 ± 0.01	23.04	9.39	0.093 ± 0.015	0.084 ± 0.01	0.0411755	p > .10	0.347208	0.371574	XP_023893083.1	Uncharacterized protein LOC112005067	Beta-hydroxyacyl-(acyl-carrier-protein) dehydratase FabZ
1716	15 ± 0	9.27 ± 0.05	18.88	8.26	0.058 ± 0.011	0.073 ± 0.024	-0.0985256	p > .10	0.250593	0.293043	XP_023882867.1	Glutathione peroxidase 2 isoform X2 (probable)
1719	15 ± 0	4.76 ± 0.01	16.8	4.67	0.054 ± 0.005	0.047 ± 0.016	0.0614723	p > .10	0.464703	0.432354	XP_023905968.1	Uncharacterized protein At5g48480-like	Vicinal oxygen chelate (VOC) domain
1731	15 ± 0	5.01 ± 0.01	17.78	5.39	0.104 ± 0.014	0.1 ± 0.008	0.0175665	p > .10	0.464703	0.625764	XP_023892637.1; XP_023918791.1	Alpha-amylase/subtilisin inhibitor-like; 4-Hydroxy-4-methyl-2-oxoglutarate aldolase 2 (putative)
1763	14 ± 0	5.44 ± 0.01	17.49	5.97	0.063 ± 0.015	0.06 ± 0.008	0.0184452	p > .10	0.754023	0.771644	XP_023890893.1	18.1 kDa class I heat shock protein-like
1745	15 ± 0	9.98 ± 0.06	19.48	8.6	0.051 ± 0.011	0.061 ± 0.02	-0.079708	p > .10	0.464703	0.390576	XP_023882185.1	Peptidyl-prolyl cis-trans isomerase CYP20-1
2866	14 ± 0	5.77 ± 0.01	17.39	6.34	0.108 ± 0.02	0.091 ± 0.013	0.0746185	p > .10	0.347208	0.197796	XP_023890893.1	18.1 kDa class I heat shock protein-like
2868	14 ± 0	5.68 ± 0.01	17.5	5.97	1.025 ± 0.096	1.04 ± 0.394	-0.00629866	p > .10	0.250593	0.942959	XP_023890893.1	18.1 kDa class I Heat shock protein-like
1766	14 ± 0	7.49 ± 0.03			0.151 ± 0.047	0.199 ± 0.104	-0.121521	p > .10	0.916815	0.419355
1768	14 ± 0	6.94 ± 0.03			0.144 ± 0.005	0.196 ± 0.087	-0.135908	p < .08	0.117186	0.258583
1769	14 ± 0	11.15 ± 0.07	18.15	8.36	0.110 ± 0.063	0.182 ± 0.144	-0.218026	p > .10	0.754023	0.387051	XP_023892180.1	Peptidyl-prolyl cis-trans isomerase isoform X2
1773	13 ± 0	10.39 ± 0.06	18.06	8.93	0.491 ± 0.153	0.683 ± 0.150	-0.143645	p < .08	0.0758011	0.110242	XP_023892180.1	Peptidyl-prolyl cis-trans isomerase isoform X2
1777	13 ± 0	9.74 ± 0.06	18.06	8.93	0.263 ± 0.053	0.355 ± 0.051	-0.1308	p > .10	0.0758011	0.037	XP_023892180.1	Peptidyl-prolyl cis-trans isomerase isoform X2
1778	13 ± 0	7.12 ± 0.03			0.303 ± 0.083	0.235 ± 0.132	0.110128	p > .10	0.174526	0.408837	XP_023910528.1	Uncharacterized protein LOC112022183	At5g01610-like superfamily (IPR036758)
1782	13 ± 0	6.34 ± 0.02			0.072 ± 0.021	0.056 ± 0.03	0.112489	p > .10	0.464703	0.40138	XP_023910528.1	Uncharacterized protein LOC112022183	At5g01610-like superfamily (IPR036758)
1784	13 ± 0	6.62 ± 0.02	18.34	6.34	0.032 ± 0.014	0.038 ± 0.014	-0.0679615	p < .08	0.347208	0.594775	XP_023912837.1; XP_023910528.1	17.5 kDa class I heat shock protein-like; Uncharacterized protein LOC112022183
1785	13 ± 0	4.46 ± 0.02	56.09	5.77	0.108 ± 0.014	0.082 ± 0.021	0.119376	p > .10	0.0758011	0.0765678	XP_023925963.1; XP_023901186.1	Prefoldin subunit 4 (probable); Aspartic proteinase-like isoform X2
1791	13 ± 0	5.83 ± 0.01			0.039 ± 0.02	0.032 ± 0.01	0.0773016	p > .10	0.601509	0.585351	XP_023910528.1	Uncharacterized protein LOC112022183	At5g01610-like superfamily (IPR036758)
1792	13 ± 0	5.72 ± 0.01	12.55	5.44	0.15 ± 0.078	0.109 ± 0.074	0.139921	p > .10	0.464703	0.46495	XP_023890910.1	18.5 kDa class I heat shock protein-like
1793	13 ± 0	5.55 ± 0.01	17.12	5.46	0.077 ± 0.048	0.059 ± 0.035	0.114985	p > .10	0.464703	0.564253	XP_023880851.1	MLP-like protein 28
1796	13 ± 0	5.93 ± 0.01	17.12	5.97	0.367 ± 0.37	0.283 ± 0.164	0.11343	p > .10	0.601509	0.687531	XP_023880851.1	MLP-like protein 28
1797	13 ± 0	5.4 ± 0.01	17.34	5.57	0.464 ± 0.181	0.428 ± 0.038	0.0353198	p > .10	0.754023	0.70503	XP_023913442.1	Peroxiredoxin-2B-like
1799	13 ± 0	10.26 ± 0.06	18.26	8.61	0.037 ± 0.006	0.041 ± 0.012	-0.0406584	p > .10	0.601509	0.596849	XP_023892180.1; XP_023919485.1	Peptidyl-prolyl cis-trans isomerase isoform X2; NADH dehydrogenase [ubiquinone] iron-sulfur protein 4, mitochondrial
1800	13 ± 0	5 ± 0.01	17.52	5.95	0.483 ± 0.103	0.474 ± 0.163	0.00774208	p > .10	0.754023	0.931521	FN755707.1	MLP-like protein 423 (predicted)
1802	13 ± 0	5.10 ± 0.01	17.12	5.46	1.146 ± 0.229	1.059 ± 0.377	0.0342455	p > .10	0.601509	0.703962	FR661874.1	FR662983 WZ0AQSAA Quercus suber cDNA clone WZ0AQSAA2YJ16NM1, mRNA sequence	Major latex-like protein
1804	12 ± 0	6.3 ± 0.02	16.53	6.2	0.054 ± 0.01	0.052 ± 0.011	0.0131827	p > .10	0.754023	0.834975	XP_023886548.1	Ubiquitin-conjugating enzyme E2 variant 1D
1805	12 ± 0	5.21 ± 0.01	17.12	5.46	2.801 ± 0.386	2.213 ± 0.726	0.102451	p > .10	0.174526	0.190339	FR662470.1	FR662470 WZ0AQSAA Quercus suber cDNA clone WZ0AQSAA1YJ19CM1, mRNA sequence	Major latex-like protein
1398	23 ± 0	6.11 ± 0.02	26.6	8.89	0.146 ± 0.035	0.154 ± 0.032	-0.0223851	p > .10	0.754023	0.753082	XP_023885279.1	20 kDa Chaperonin, chloroplastic-like
1845	11 ± 0	5.66 ± 0.01	17.55	5.87	0.161 ± 0.062	0.151 ± 0.086	0.028616	p < .08	0.464703	0.851777	XP_023917014.1	Major allergen Pru ar 1-like
1847	11 ± 0	6.48 ± 0.02	17.43	6.16	0.207 ± 0.061	0.277 ± 0.137	-0.128097	p > .10	0.601509	0.372093	XP_023917014.1	Major allergen Pru ar 1-like
1868	11 ± 0	5.29 ± 0.01	15.39	5.62	0.078 ± 0.019	0.087 ± 0.013	-0.0439745	p < .08	0.347208	0.486471	XP_023927903.1; XP_023886382.1	Superoxide dismutase [Cu-Zn] 4A; DNA-binding protein DDB_G0278111
1870	11 ± 0	7.31 ± 0.03	17.32	7.84	0.42 ± 0.096	0.616 ± 0.114	-0.165925	p < .08	0.0282808	0.0304467	XP_023927194.1	Glycine-rich RNA-binding protein-like
1905	10 ± 0	5.11 ± 0.01	17.33	7.84	0.153 ± 0.035	0.156 ± 0.016	-0.0079179	p > .10	0.754023	0.886252	XP_023927194.1	Glycine-rich RNA-binding protein-like
1917	10 ± 0	4.28 ± 0.02	11.46	4.32	0.238 ± 0.092	0.235 ± 0.11	0.00479979	p < .08	0.916815	0.971866	XP_023884504.1	60S Acidic ribosomal protein P2B-like
1920	10 ± 0	7.44 ± 0.03			0.077 ± 0.026	0.086 ± 0.012	-0.0456492	p < .08	0.174526	0.573312	XP_023884368.1	NADH dehydrogenase [ubiquinone] 1 beta subcomplex subunit 9
1928	10 ± 0	5.35 ± 0.01	16.76	5.48	0.12 ± 0.039	0.125 ± 0.024	-0.0164505	p < .08	0.464703	0.844946	XP_023927194.1	Glycine-rich RNA-binding protein-like
1947	10 ± 0	6.58 ± 0.02	16.35	6.84	0.727 ± 0.166	0.702 ± 0.087	0.0155844	p > .10	0.916815	0.790832	XP_023906276.1	Nucleoside diphosphate kinase 1
2017	9 ± 0	4.04 ± 0.02	57.77	4.57	0.239 ± 0.079	0.225 ± 0.079	0.0258863	p > .10	0.916815	0.810193	XP_023924877.1	Calmodulin-7-like
2023	9 ± 0	4.96 ± 0.01	10.01	5.62	0.031 ± 0.009	0.036 ± 0.014	-0.0741822	p > .10	0.601509	0.514009	XP_023889933.1	Phosphatidylglycerol/phosphatidylinositol transfer protein DDB_G0282179 (putative)
2030	9 ± 0	8.16 ± 0.04	19.27	8.78	0.062 ± 0.018	0.064 ± 0.034	-0.018391	p > .10	0.754023	0.893523	XP_023913757.1	Ribulose bisphosphate carboxylase small chain clone 512-like
2041	9 ± 0	4.84 ± 0.01	16.57	4.73	0.148 ± 0.025	0.154 ± 0.032	-0.0161164	p > .10	0.916815	0.788811	XP_023876837.1	Calcium-binding protein CML13 (probable)
2043	9 ± 0	6.11 ± 0.02	15.19	6.83	0.043 ± 0.012	0.038 ± 0.007	0.05255	p > .10	0.464703	0.478477	XP_023892871.1	Thioredoxin-like protein Clot
2135	8 ± 0	4.52 ± 0.02	15.81	4.41	0.048 ± 0.023	0.04 ± 0.009	0.078143	p > .10	0.916815	0.544315	XP_023875442.1	Uncharacterized protein LOC111987929	Calcium ion binding protein
2196	8 ± 0	4.68 ± 0.01	14.09	5.06	0.055 ± 0.007	0.053 ± 0.009	0.0165778	p > .10	0.464703	0.730843	XP_023884715.1	Profilin-4
2821	76 ± 1	5.56 ± 0.01			0.088 ± 0.008	0.081 ± 0.014	0.0370897	p > .10	0.347208	0.406231
406	80 ± 1	5.07 ± 0.01	71.38	5.13	0.935 ± 0.217	0.870 ± 0.132	0.0314443	p > .10	0.916815	0.620308	XP_023899452.1	Heat shock cognate 70 kDa protein 2-like
2824	76 ± 1	5.16 ± 0.01	71.11	6.1	0.038 ± 0.011	0.063 ± 0.034	-0.220835	p > .10	0.250593	0.193262	XP_023895846.1	Heat shock cognate 70 kDa protein-like
2825	68 ± 1	4.79 ± 0.01			0.442 ± 0.114	0.348 ± 0.082	0.104539	p > .10	0.174526	0.213481	XP_023886485.1	Uncharacterized protein At5g39570-like isoform X1	PLD-regulated protein1-like (IPR038943)
2827	63 ± 1	5.09 ± 0.01	49.14	5.25	0.094 ± 0.025	0.105 ± 0.023	-0.0497488	p > .10	0.464703	0.523257	XP_023883416.1	ATP synthase subunit beta, mitochondrial-like
2829	62 ± 1	5.06 ± 0.01	49.14	5.25	0.051 ± 0.013	0.064 ± 0.021	-0.0986917	p > .10	0.601509	0.337975	XP_023883416.1	ATP synthase subunit beta, mitochondrial-like
2831	62 ± 1	5.03 ± 0.01			0.035 ± 0.011	0.036 ± 0.012	-0.00606378	p > .10	0.916815	0.953025
2832	58 ± 1	5 ± 0.01	39.94	6.45	0.231 ± 0.045	0.245 ± 0.05	-0.0259417	p > .10	0.464703	0.683761
2833	58 ± 1	5.02 ± 0.01			0.241 ± 0.047	0.218 ± 0.018	0.0430535	p > .10	0.347208	0.391441
2834	60 ± 1	4.84 ± 0.01	63.1	6	0.08 ± 0.011	0.09 ± 0.015	-0.0519864	p > .10	0.250593	0.311487	XP_023928101.1	Protein SRC2
2835	58 ± 1	4.85 ± 0.01	63.1	6	0.086 ± 0.012	0.094 ± 0.024	-0.0371723	p > .10	0.754023	0.581352	XP_023928101.1	Protein SRC3
2836	60 ± 1	4.72 ± 0.01	40.15	4.6	0.051 ± 0.013	0.052 ± 0.02	-0.00921296	p > .10	0.464703	0.928358	XP_023914300.1	Ubiquitin receptor RAD23c-like
2837	60 ± 1	4.77 ± 0.01	40.15	4.6	0.066 ± 0.011	0.067 ± 0.021	-0.00654428	p > .10	0.916815	0.933765	XP_023914300.1	Ubiquitin receptor RAD23c-like
2841	49 ± 1	6.06 ± 0.02			0.051 ± 0.014	0.052 ± 0.016	-0.00701618	p > .10	0.754023	0.940305
2844	48 ± 1	5.96 ± 0.01	49.41	6.25	0.064 ± 0.005	0.076 ± 0.018	-0.0747207	p > .10	0.174526	0.232935	XP_023919977.1	Elongation factor Tu, mitochondrial
2845	49 ± 1	5.88 ± 0.01	49.16	6.11	0.058 ± 0.018	0.07 ± 0.022	-0.0760981	p > .10	0.347208	0.444536	XP_023919977.1	Elongation factor Tu, mitochondrial
2846	47 ± 1	4.89 ± 0.01	26.93	8.83	0.126 ± 0.038	0.107 ± 0.022	0.0686968	p > .10	0.464703	0.42888	XP_023928101.1	Protein SRC2
2847	43 ± 1	7.19 ± 0.03	23.77	7.84	0.78 ± 0.148	0.848 ± 0.245	-0.0364008	p > .10	0.464703	0.647172	XP_023882741.1; XP_023881864.1	Glyceraldehyde-3-phosphate dehydrogenase, cytosolic-like; Fructose-bisphosphate aldolase 6, cytosolic
2848	43 ± 1	5.53 ± 0.01	33.82	8.88	0.192 ± 0.02	0.256 ± 0.083	-0.12536	p < .08	0.0472026	0.168964	XP_023894394.1; FN762577.1	Aldo-keto reductase 2 (probable); WZOAQPAA Quercus petraea cDNA clone WZ0AQPAH6YH24FM1	Ripening-induced protein (alternative name for Quinone oxidoreductase)
2849	42 ± 1	5.38 ± 0.01	34.32	5.62	0.133 ± 0.026	0.133 ± 0.025	-0.00155233	p > .10	0.916815	0.979391	XP_023906047.1	Cysteine synthase-like isoform X1
2850	41 ± 1	5.28 ± 0.01	34.34	5.5	0.381 ± 0.06	0.406 ± 0.045	-0.0283253	p > .10	0.601509	0.51329	XP_023876555.1; XP_023910627.1	Cysteine synthase; Isoflavone reductase-like protein
2852	33 ± 0	7.83 ± 0.04	35.05	5.22	0.099 ± 0.033	0.112 ± 0.086	-0.0541307	p > .10	0.464703	0.78313	XP_023917154.1	Cationic peroxidase 1-like
2853	31 ± 0	7.31 ± 0.03	29.26	7.91	0.283 ± 0.128	0.278 ± 0.064	0.00820009	p > .10	0.916815	0.943037	XP_023928050.1	Mitochondrial outer membrane protein porin of 36 kDa
2854	32 ± 0	4.07 ± 0.02			0.101 ± 0.051	0.095 ± 0.079	0.0280975	p > .10	0.601509	0.896265
2856	29 ± 0	5.11 ± 0.01	27.55	5.31	0.951 ± 0.134	0.736 ± 0.161	0.111011	p < .08	0.0472026	0.074605	XP_023879901.1	Caffeoyl-CoA O-methyltransferase
2858	30 ± 0	5.17 ± 0.01	27.78	5.4	0.156 ± 0.065	0.097 ± 0.024	0.206701	p > .10	0.174526	0.127799	XP_023879901.1	Caffeoyl-CoA O-methyltransferase
2859	29 ± 0	5.38 ± 0.01	29.5	5.78	0.292 ± 0.012	0.326 ± 0.071	-0.0473749	p > .10	0.601509	0.379432	XP_023893302.1	Glutathione S-transferase L3-like
2860	29 ± 0	5.68 ± 0.01	26.81	7.65	0.027 ± 0.005	0.041 ± 0.013	-0.172081	p < .08	0.0282808	0.0905065
2862	28 ± 0	5.59 ± 0.01	27.44	5.41	0.222 ± 0.041	0.246 ± 0.041	-0.0449917	p > .10	0.250593	0.428113	XP_023893302.1	Glutathione S-transferase L3-like
2863	26 ± 0	5.78 ± 0.01			0.207 ± 0.024	0.245 ± 0.076	-0.0724563	p > .10	0.601509	0.374846	XP_023889612.1; XP_023909159.1	Proteasome subunit alpha type-6; L-Ascorbate peroxidase, cytosolic-like
2864	26 ± 0	5.13 ± 0.01	25.7	5.51	0.114 ± 0.016	0.135 ± 0.03	-0.0735746	p > .10	0.250593	0.245118	XP_023879901.1; XP_023918993.1; XP_023894071.1;	Caffeoyl-CoA O-methyltransferase; UMP-CMP kinase 3-like isoform X1; Proteasome subunit alpha type-2-B;
2865	21 ± 0	5.86 ± 0.01			0.036 ± 0.003	0.05 ± 0.008	-0.148663	p < .025	0.00902386	0.00875993
409	80 ± 1	4.90 ± 0.01	75.63	5.31	0.330 ± 0.031	0.289 ± 0.075	0.0574104	p > .10	0.347208	0.343425	XP_023886202.1	Heat shock-related protein, stromal 70 kDa
2867	14 ± 0	5.08 ± 0.01	17.39	6.34	0.084 ± 0.029	0.074 ± 0.006	0.0596481	p > .10	0.754023	0.4857
2822	77 ± 1	5.56 ± 0.01			0.074 ± 0.02	0.087 ± 0.013	-0.0681044	p > .10	0.250593	0.320448	XP_023879118.1	Hsp70-Hsp90 organizing protein 3-like
2873	12 ± 0	4.86 ± 0.01	12.4	4.95	0.205 ± 0.065	0.242 ± 0.078	-0.0717157	p > .10	0.464703	0.489661	XP_023895256.1; FR666548.1	Small ubiquitin-related modifier 1; MLP-like protein 423 (predicted)
2874	12 ± 0	4.32 ± 0.02	12.14	4.23	0.129 ± 0.018	0.146 ± 0.026	-0.0522243	p > .10	0.347208	0.328452	XP_023921712.1	60S Acidic ribosomal protein P3-like isoform X2
2875	11 ± 0	5.38 ± 0.01			1.124 ± 0.318	0.793 ± 0.184	0.151545	p > .10	0.174526	0.109452	XP_023920497.1; XP_023913043.1	17.3 kDa class II Heat shock protein-like; Glycine-rich RNA-binding protein-like
2876	12 ± 0	10.35 ± 0.06			0.062 ± 0.015	0.067 ± 0.03	-0.0369998	p > .10	0.754023	0.749841
2877	11 ± 0	9.79 ± 0.06	14.69	8.2	0.077 ± 0.02	0.074 ± 0.026	0.0218066	p > .10	0.601509	0.823457	XP_023898571.1	Nitrogen regulatory protein P-II homolog
2878	11 ± 0	5.96 ± 0.01	17.55	5.87	0.372 ± 0.124	0.4 ± 0.245	-0.0316415	p > .10	0.916815	0.842694	AFF59689.1	Bet v 1 allergen
2880	11 ± 0	6.20 ± 0.02	17.43	6.16	0.105 ± 0.027	0.123 ± 0.067	-0.0689418	p > .10	0.754023	0.628514	XP_023917014.1	Major allergen Pru ar 1-like
2881	10 ± 0	5.29 ± 0.01			0.054 ± 0.007	0.072 ± 0.025	-0.121006	p > .10	0.601509	0.220396	XP_023889878.1	Uncharacterized protein LOC112001933	Thylakoid membrane protein Ssl2009-like (IPR040377)
2882	10 ± 0	5.94 ± 0.01	16.47	5.72	0.162 ± 0.046	0.158 ± 0.023	0.0109263	p > .10	0.916815	0.880299	XP_023906276.1; XP_023872026.1	Nucleoside diphosphate kinase 1; Subtilisin-like protease SBT3.3
2883	8 ± 0	7.25 ± 0.03			0.026 ± 0.006	0.027 ± 0.012	-0.0113287	p > .10	0.754023	0.922836
2886	56 ± 2	5.20 ± 0.01	49.14	5.25	0.474 ± 0.119	0.506 ± 0.088	-0.029013	p > .10	0.601509	0.670332	XP_023883416.1	ATP synthase subunit beta, mitochondrial-like
2888	62 ± 1	5.24 ± 0.01			0.236 ± 0.064	0.22 ± 0.032	0.030088	p > .10	0.601509	0.670633	XP_023928354.1; XP_023883416.1	Enolase 1; ATP synthase subunit beta, mitochondrial-like
2890	52 ± 1	6.11 ± 0.02	42.35	5.57	0.033 ± 0.009	0.047 ± 0.01	-0.147982	p > .10	0.0758011	0.0767498	XP_023895486.1	Heterogeneous nuclear ribonucleoprotein 1-like
2892	13 ± 0	8.21 ± 0.04	18.17	5.62	0.304 ± 0.051	0.399 ± 0.106	-0.117849	p > .10	0.250593	0.146812	XP_023883535.1; XP_023892180.1	Universal stress protein PHOS32-like; Peptidyl-prolyl cis-trans isomerase isoform X2
